# Supplementary material
Source: HighWire-hosted journal article supplement (http://www.cmaj.ca/highwire/filestream/58972/field_highwire_adjunct_files/0/five-prenatal-1-at.pdf)
Supplement: five-prenatal-1-at.pdf [file five-prenatal-1-at.pdf]

## Appendix 1: References

1. Walsh JM, Goldberg JD. Fetal aneuploidy detection by maternal plasma DNA sequencing: a technology assessment. *Prenat Diagn* 2013;33:514-20.
2. Benn P, Borell A, Chiu R, et al. Position statement from the Aneuploidy Screening Committee on behalf of the Board of the International Society for Prenatal Diagnosis. *Prenat Diagn* 2013;33:622-9.
3. Langlois S, Brock JA; SOGC Genetics Committee. Current status in non-invasive prenatal detection of Down syndrome, trisomy 18, and trisomy 13 using cell-free DNA in maternal plasma. *J Obstet Gynaecol Can* 2013;35:177-81.
4. Morain S, Green MF, Mello MM. A new era in noninvasive prenatal testing. *N Engl J Med* 2013;369:499-501.
5. Benn P, Cuckle H, Pergament E. Non-invasive prenatal testing for aneuploidy: current status and future prospects. *Ultrasound Obstet Gynecol* 2013;42:15-33.
6. Nicolaides KH, Syngelaki A, Ashoor G, et al. Noninvasive prenatal testing for fetal trisomies in a routinely screened first-trimester population. *Am J Obstet Gynecol* 2012; 207:374.e1-6.
7. Bianchi DW, Parker RL, Wentworth J, et al. DNA sequencing versus standard prenatal aneuploidy screening. *N Engl J Med* 2014;370:799-808.
